# Supplementary material for: A comprehensive analysis of the FOX family for predicting kidney renal clear cell carcinoma prognosis and the oncogenic role of FOXG1
Source: publisher site journal article supplement (doi:10.18632/aging.204448), 2022-12-29
Supplement: Supplementary file [file aging-v14i24-204448-supplementary-material-SD1.pdf]

## SUPPLEMENTARY FIGURE

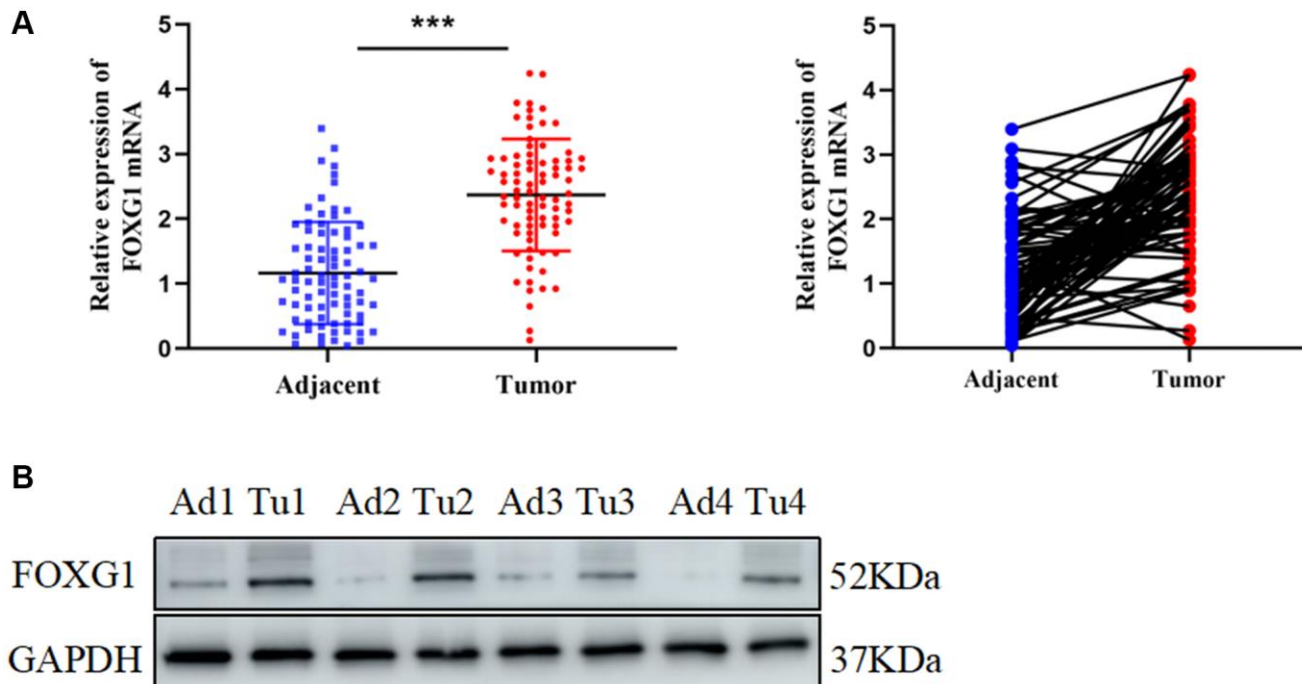

**Supplementary Figure 1. FOXG1 expression is significantly up-regulated in ccRCC tissues.** FOXG1 mRNA (A) and protein (B) levels in ccRCC tumor tissues and corresponding adjacent nontumor tissues. \* $p < 0.05$ , \*\* $p < 0.01$ , \*\*\* $p < 0.001$ .
